# Supplementary material
Source: Springer Nature journal article supplement (https://www.springermedizin.de/resource/supplementary/12913_2014_3195_MOESM1_ESM.pdf/9532642)
Supplement: MOESM1 [file 9532642]

Additional file 1. All items used in factor analysis with full questions and answer categories

| Item no. | Question                                                                                                                | Answer categories                                                                            |
|----------|-------------------------------------------------------------------------------------------------------------------------|----------------------------------------------------------------------------------------------|
| 1        | How often did your physiotherapist spent enough time on you in treatment?                                               | {1,Never}<br>{2,Sometimes}<br>{3,Usually}<br>{4,Always}                                      |
| 2        | Did (does) the duration of the treatment (so far) correspond to your expectation?                                       | {1,Not}<br>{2,Slightly}<br>{3,Largely}<br>{4,Fully}                                          |
| 3        | To what extent did your physiotherapist try to understand the problem for which you came?                               | {1,Not}<br>{2,Slightly}<br>{3,Largely}<br>{4,Fully}                                          |
| 4        | Were you well informed by your physiotherapist about the probable course of your complaint or illness?                  | {1,Never}<br>{2,Sometimes}<br>{3,Usually}<br>{4,Always}                                      |
| 5        | How often did your physiotherapist clearly explained how, why, and how often an exercise had to be carried out at home? | {1,Never}<br>{2,Sometimes}<br>{3,Usually}<br>{4,Always}<br>{5,I didn't have home exercises}* |
| 6        | How often did your physiotherapist give you advice that you could daily use?                                            | {1,Never}<br>{2,Sometimes}<br>{3,Usually}<br>{4,Always}                                      |
| 7        | How often was your physiotherapist available during treatment for questions?                                            | {1,Never}<br>{2,Sometimes}<br>{3,Usually}<br>{4,Always}                                      |
| 8        | How often did your physiotherapist explain things in an understandable way?                                             | {1,Never}<br>{2,Sometimes}<br>{3,Usually}<br>{4,Always}                                      |
| 9        | How often did your physiotherapist clearly explain what he/she was doing?                                               | {1,Never}<br>{2,Sometimes}<br>{3,Usually}<br>{4,Always}                                      |
| 10       | Did your physiotherapist regularly ask how you were doing?                                                              | {1,Never}<br>{2,Sometimes}<br>{3,Usually}<br>{4,Always}                                      |
| 11       | How often did your physiotherapist listen to you carefully?                                                             | {1,Never}<br>{2,Sometimes}<br>{3,Usually}<br>{4,Always}                                      |
| 12       | How often did your physiotherapist take you seriously?                                                                  | {1,Never}<br>{2,Sometimes}<br>{3,Usually}<br>{4,Always}                                      |
| 13       | How often did your physiotherapist take your specific circumstances and wishes into account?                            | {1,Never}<br>{2,Sometimes}<br>{3,Usually}<br>{4,Always}                                      |
| 14       | Did your physiotherapist work together with you to achieve the treatment goals?                                         | {1,Not}<br>{2,Slightly}<br>{3,Largely}<br>{4,Fully}                                          |

\*Coded system missing

Additional file 1. Continued

|    |                                                                                                                          |                                                                                                |
|----|--------------------------------------------------------------------------------------------------------------------------|------------------------------------------------------------------------------------------------|
| 15 | How often did your physiotherapist ensure that you were feeling at ease with him/her?                                    | {1,Never}<br>{2,Sometimes}<br>{3,Usually}<br>{4,Always}                                        |
| 16 | Did your physiotherapist ask you if your exercises at home went well?                                                    | {1,Never}<br>{2,Sometimes}<br>{3,Usually}<br>{4,Always}<br>{5,I didn't have home exercises}*   |
| 17 | Did your physiotherapist ask what you had done with his/her advise?                                                      | {1,Never}<br>{2,Sometimes}<br>{3,Usually}<br>{4,Always}<br>{5,I did not receive advise}*       |
| 18 | How often was the physiotherapy practice accessible by phone?                                                            | {1,Never}<br>{2,Sometimes}<br>{3,Usually}<br>{4,Always}<br>{5,I have not called the practice}* |
| 19 | Did you have the possibility to choose a physiotherapist that suited you?                                                | {1,No}<br>{2,Yes}                                                                              |
| 20 | How often were you helped within 15 minutes of the time of the appointment?                                              | {1,Never}<br>{2,Sometimes}<br>{3,Usually}<br>{4,Always}                                        |
| 21 | Was there sufficient specialist expertise for your needs available within the physiotherapy practice?                    | {1,Yes}<br>{2,No}<br>{3,I had no need for specialist treatment}*<br>{4,I don't know}*          |
| 22 | Was the physiotherapy practice easily accessible with the transportation that you usually used?                          | {1,Never}<br>{2,Sometimes}<br>{3,Usually}<br>{4,Always}                                        |
| 23 | Did you think that the exercise room offered sufficient comfort (with regard to size, temperature, light, floor surface) | {1,Never}<br>{2,Sometimes}<br>{3,Usually}<br>{4,Always}<br>{5,Does not apply}*                 |
| 24 | Did the practice have facilities to make the wait more pleasant for you?                                                 | {1,Yes}<br>{2,No}<br>{3,Does not apply}*                                                       |
| 25 | Did you think that there were enough comfortable seats present in the waiting area of the practice?                      | {1,Never}<br>{2,Sometimes}<br>{3,Usually}<br>{4,Always}                                        |
| 26 | Have you been treated by different physiotherapists for your complaints?                                                 | {1,No}<br>{2,Yes}                                                                              |
| 27 | Were you well informed by your physiotherapist about the duration of the treatment?                                      | {1,No}<br>{2,Yes}                                                                              |
| 28 | How often did your physiotherapist give you contradictory information?                                                   | {1,Never}<br>{2,Sometimes}<br>{3,Usually}<br>{4,Always}                                        |

\*Coded system missing

Additional file 1. Continued

|    |                                                                                                                                                                          |                                                                                                                                                                                                              |
|----|--------------------------------------------------------------------------------------------------------------------------------------------------------------------------|--------------------------------------------------------------------------------------------------------------------------------------------------------------------------------------------------------------|
| 29 | Within how many days after registration could you go to your physiotherapist?                                                                                            | {1, Within 0-2 days}<br>{2, Within 3-7 days}<br>{3, Within 8-14 days}<br>{4, Longer than 14 days}                                                                                                            |
| 30 | How often could you make an appointment at a time that suited you?                                                                                                       | {1, Never}<br>{2, Sometimes}<br>{3, Usually}<br>{4, Always}                                                                                                                                                  |
| 31 | Did you think that the physiotherapy practice was clean?                                                                                                                 | {1, Never}<br>{2, Sometimes}<br>{3, Usually}<br>{4, Always}                                                                                                                                                  |
| 32 | Did you think that the practice offered enough privacy? (For example, when changing clothes, during consult, during the treatment and regarding confidentiality of data) | {1, Yes}<br>{2, No}                                                                                                                                                                                          |
| 33 | Was the physiotherapy practice accessible for you? (For example with regard to the entry of the practice, were there (too) high thresholds, or difficult steps)          | {1, No}<br>{2, Yes}                                                                                                                                                                                          |
| 34 | Did the physiotherapists inform you on different treatment possibilities?                                                                                                | {1, No}<br>{2, Yes}<br>{3, Does not apply to my complaints}*<br>{4, Always}                                                                                                                                  |
| 35 | How often did your physiotherapist treat you polite?                                                                                                                     | {1, Never}<br>{2, Sometimes}<br>{3, Usually}<br>{4, Always}                                                                                                                                                  |
| 36 | Did your physiotherapist discussed the progress of your treatment with your general practitioner (in consultation with you)?                                             | {1, No}<br>{2, Yes}<br>{3, I don't know}*<br>{4, Does not apply}*<br>{5, I have indicated myself that I would not appreciate feedback to my general practitioner }*                                          |
| 37 | Did your physiotherapist give you advise on how you could prevent new complaints?                                                                                        | {1, No}<br>{2, Yes}                                                                                                                                                                                          |
| 38 | Were the results of the treatment discussed with you?                                                                                                                    | {1, No}<br>{2, Yes}                                                                                                                                                                                          |
| 39 | How often did you feel that you could perform your daily activities better because of the treatment of your physiotherapist?                                             | {1, Never}<br>{2, Sometimes}<br>{3, Usually}<br>{4, Always}                                                                                                                                                  |
| 40 | To what extent did (does) the result of the treatment (up to now) correspond to your expectations?                                                                       | {1, Not}<br>{2, Slightly}<br>{3, Largely}<br>{4, Fully}                                                                                                                                                      |
| 41 | To what extent did your complaints change in relation to the period before the treatment? The complaints are ...                                                         | {1, Extremely better}<br>{2, Much better}<br>{3, Moderately better}<br>{4, Slightly better}<br>{5, No difference}<br>{6, Slightly worse}<br>{7, Moderately worse}<br>{8, Much worse}<br>{9, Extremely worse} |

\*Coded system missing
